# Supplementary material for: Metal–organic architectures driven by a multifunctional 6-aminouracil spacer: structures, noncovalent interactions, and conductivity
Source: Royal Society of Chemistry journal article supplement (doi:10.1039/c9ce01437c), 2019-12-16
Supplement: c9ce01437c1.pdf [file c9ce01437c1.pdf]

*Electronic supplementary information (ESI)*

**Metal-organic Architectures Driven by a Multifunctional 6-Aminouracil Spacer: Structures, Noncovalent Interactions, and Conductivity**

Atanu Purkayastha,<sup>a</sup> Sourab Dhar,<sup>b</sup> Suvra Prakash Mondal,<sup>b</sup> Antonio Franconetti,<sup>c</sup> Antonio Frontera,<sup>\*c</sup> Rakesh Ganguly,<sup>\*d</sup> Alexander M. Kirillov,<sup>\*e,f</sup> Tarun Kumar Misra<sup>\*a</sup>

---

<sup>a</sup> Department of Chemistry, National Institute of Technology Agartala, Tripura 799046, India; E-mail: tkmisra.chem@nita.ac.in / tkmisra70@yahoo.com

<sup>b</sup> Department of Physics, National Institute of Technology Agartala, Tripura 799046, India

<sup>c</sup> Departamento de Química, Universitat de les Illes Balears, Crta. de Valldemossa 07122, Spain; E-mail: toni.frontera@uib.es

<sup>d</sup> Division of Chemistry & Biological Chemistry, Nanyang Technology University, Singapore 639798; E-mail: rganguly@ntu.edu.sg

<sup>e</sup> Centro de Química Estrutural, Instituto Superior Técnico, Universidade de Lisboa, Av. Rovisco Pais, 1049-1005, Lisbon, Portugal; E-mail: kirillov@tecnico.ulisboa.pt

<sup>f</sup> Research Institute of Chemistry, Peoples' Friendship University of Russia (RUDN University), 6 Miklukho-Maklaya st., Moscow, 117198, Russian Federation

### Supplementary Figures

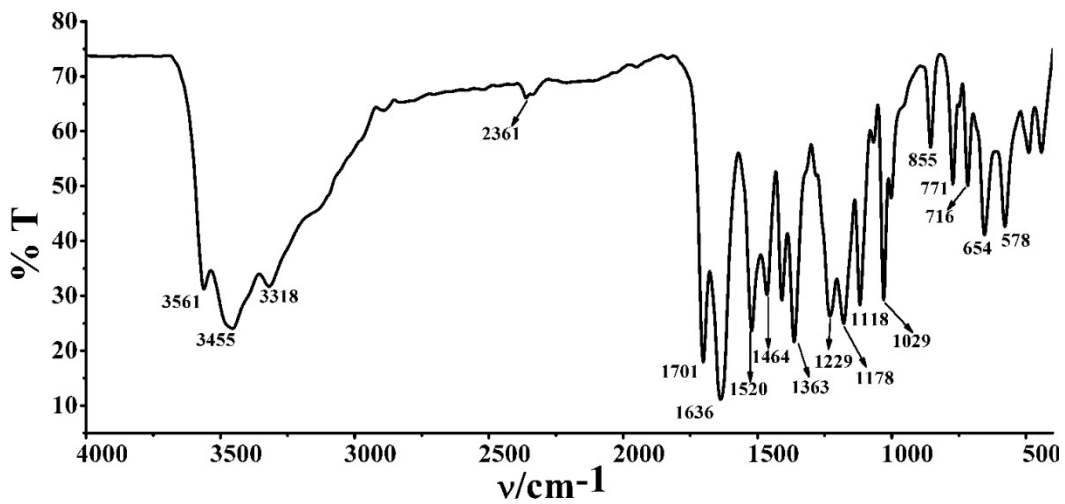

Figure S1: IR spectrum of 1.

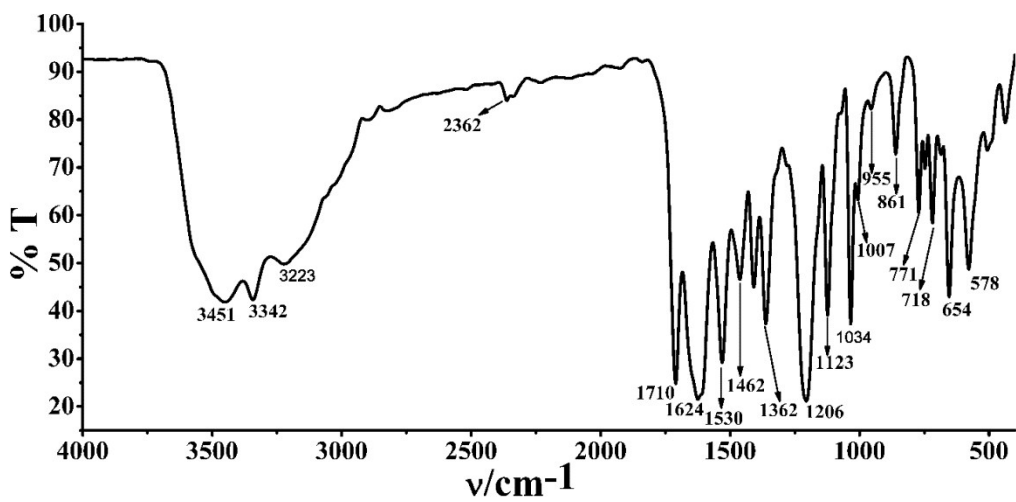

Figure S2: IR spectrum of 2.

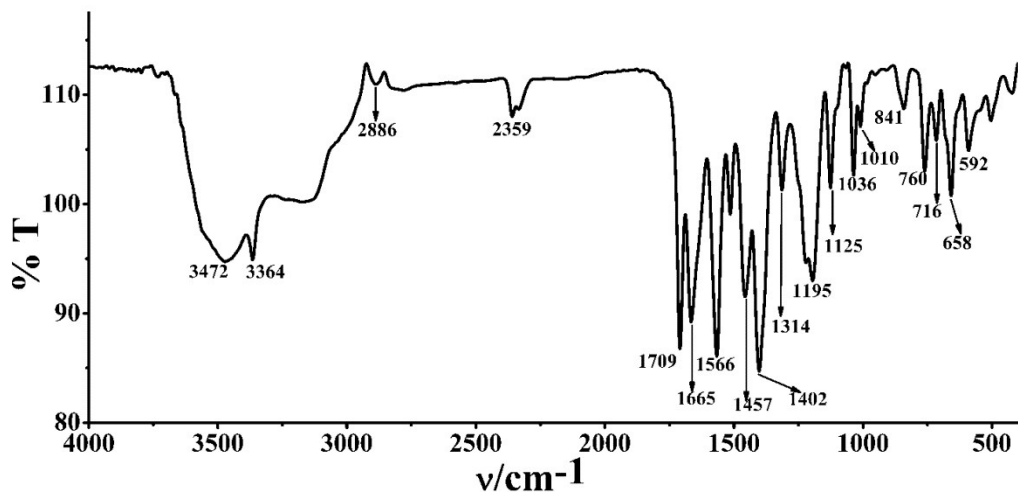

Figure S3: IR spectrum of 3.

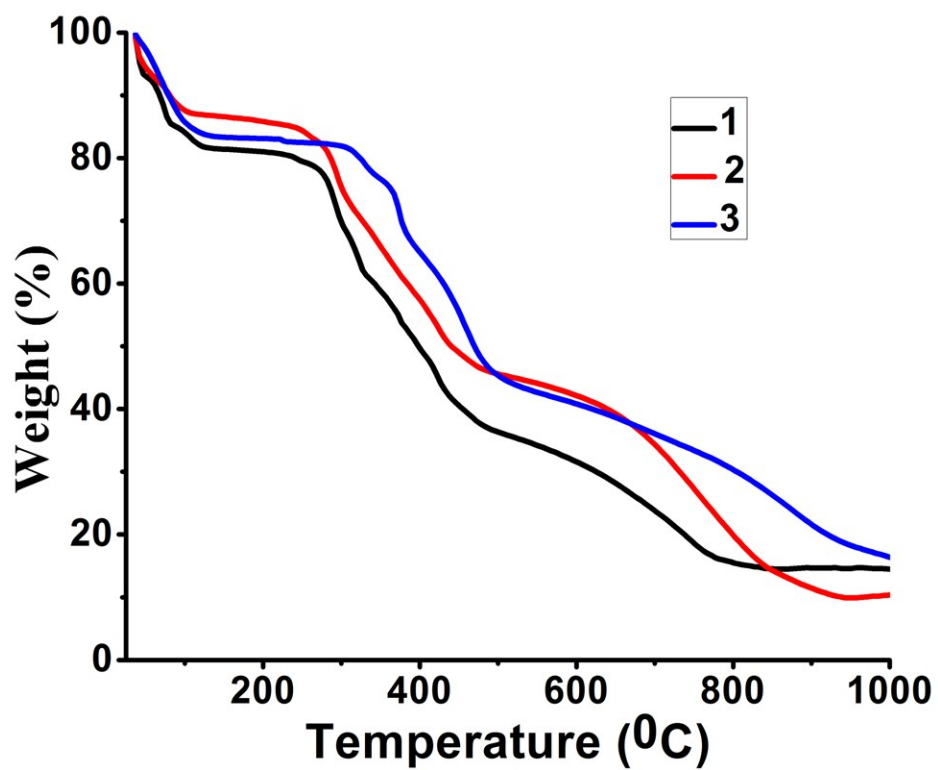

Figure S4: TGA plots of 1-3.

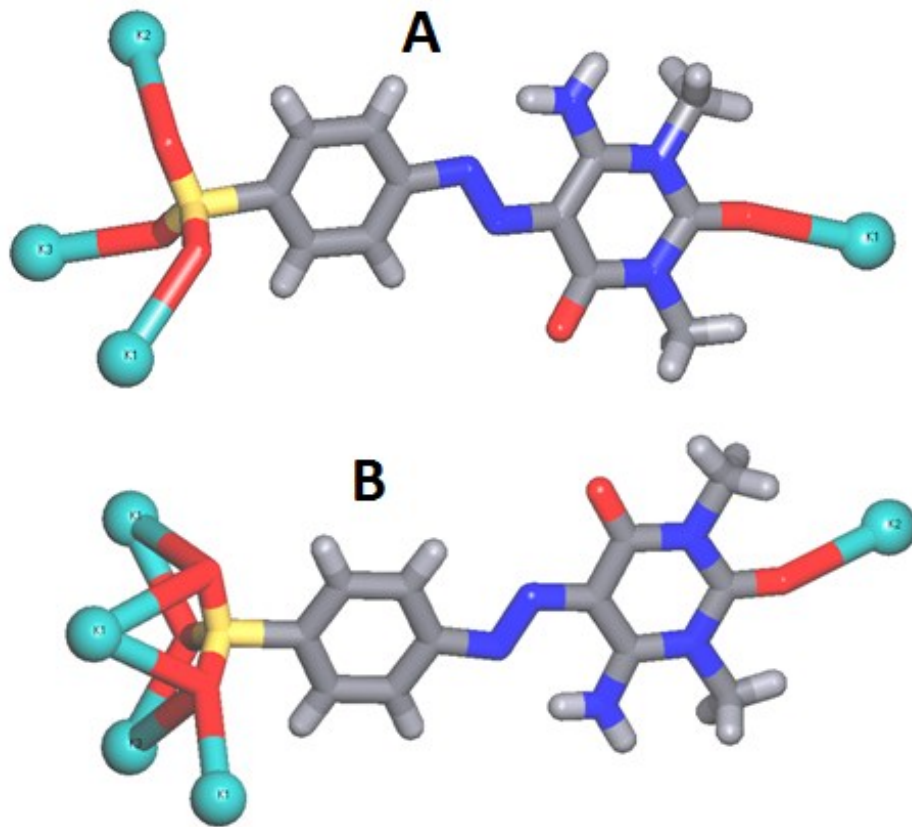

**Figure S5:** Connectivity of (A)  $\mu_4\text{-H}_2\text{L}^-$  (top) and (B)  $\mu_5\text{-H}_2\text{L}^-$  (bottom) blocks in compound 2.

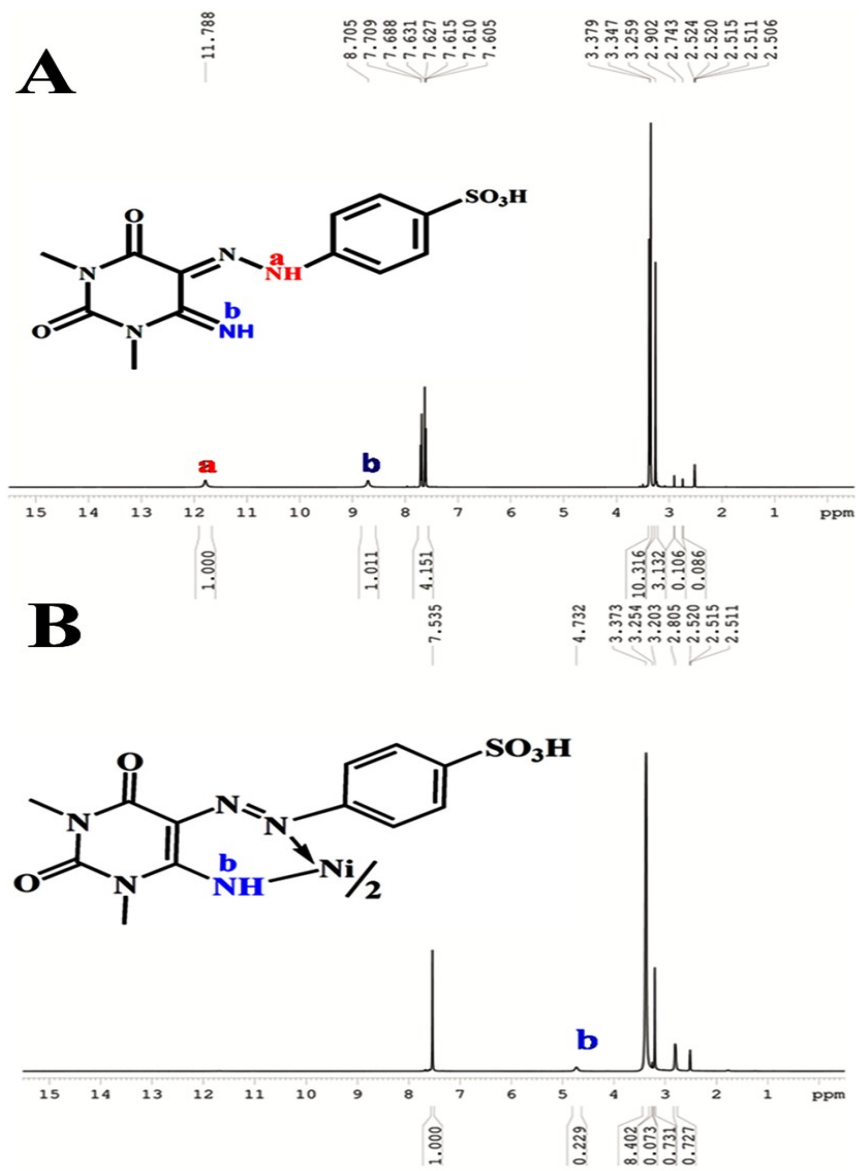

Figure S6:  $^1\text{H}$  NMR spectra of 1 (A) and 3 (B).

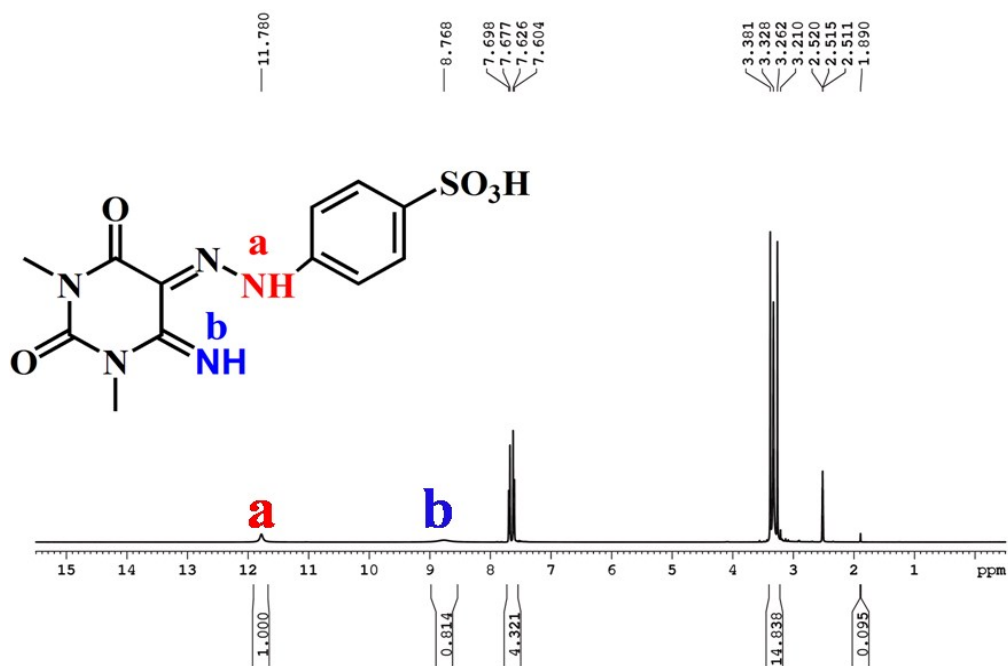

Figure S7: <sup>1</sup>H NMR spectrum of 2.

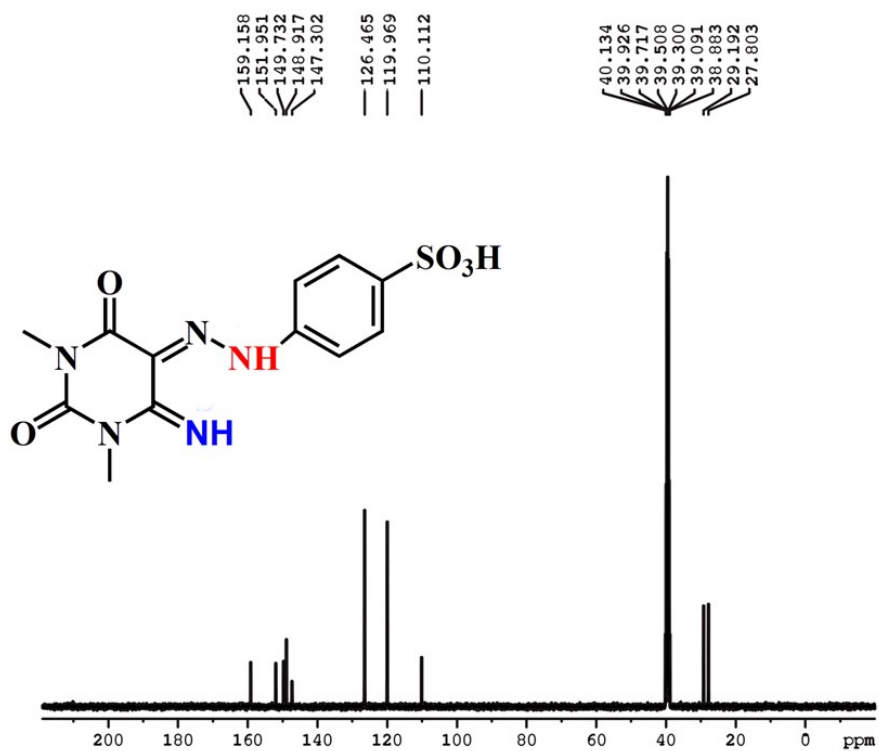

Figure S8: <sup>13</sup>C NMR spectrum of 1.

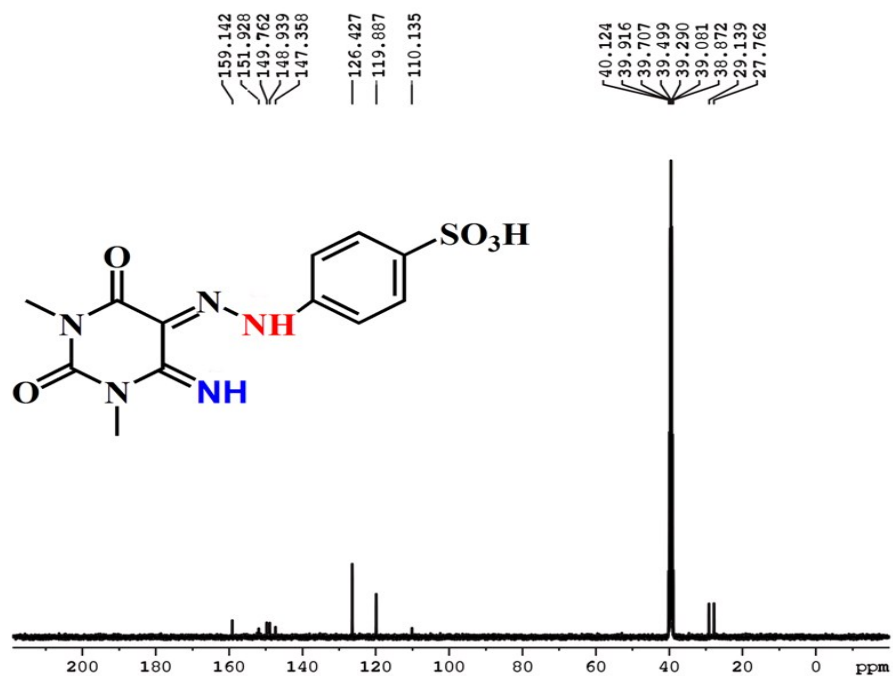

Figure S9: <sup>13</sup>C NMR spectrum of 2.

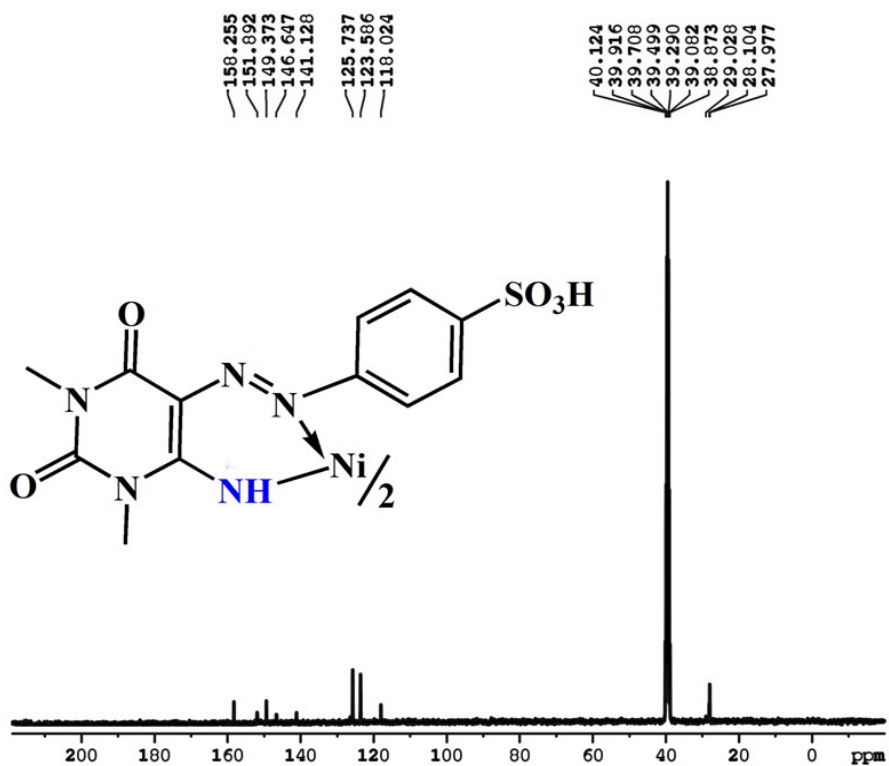

Figure S10: <sup>13</sup>C NMR spectrum of 3.

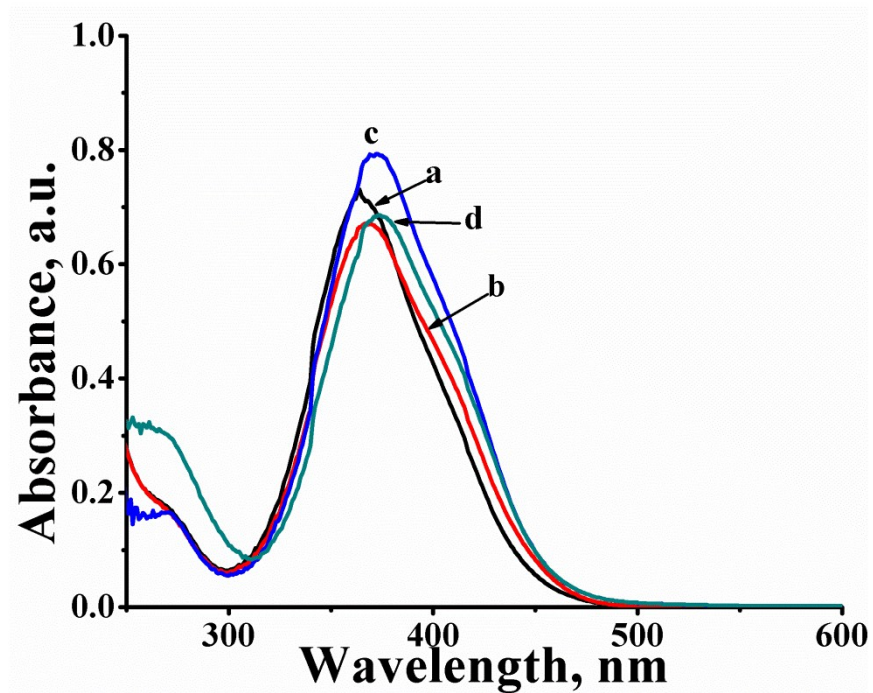

Figure S11: UV-vis spectra of 1 in (a) MeOH, (b) EtOH, (c) DMF and (d) DMSO.

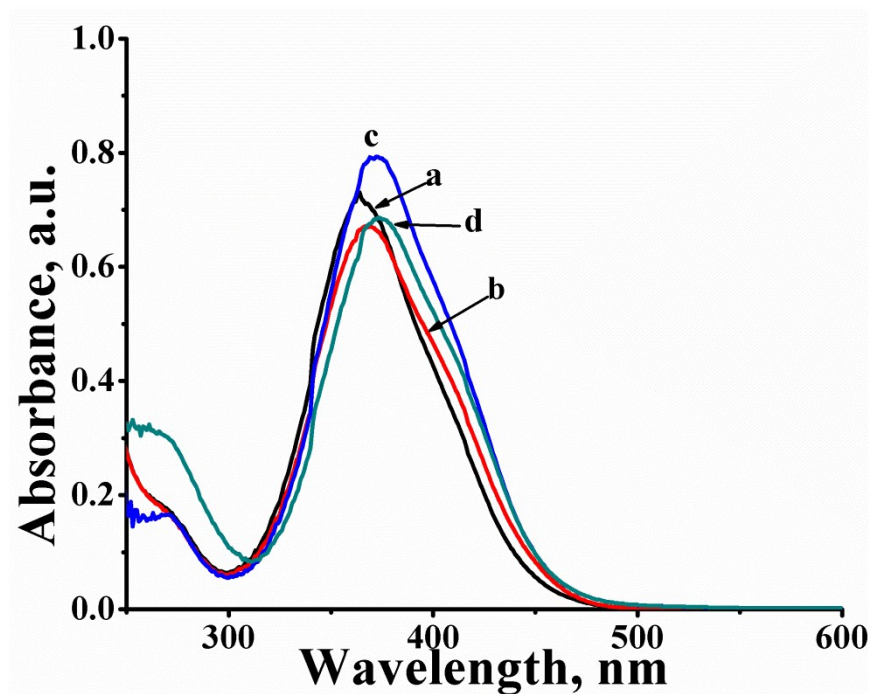

Figure S12: UV-vis spectra of 2 in (a) MeOH, (b) EtOH, (c) DMF and (d) DMSO.



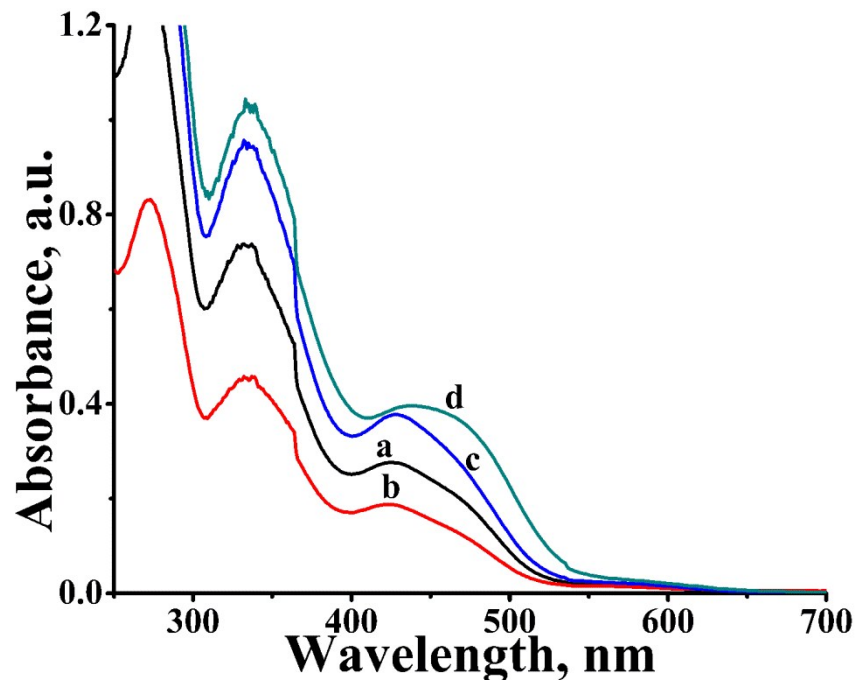

**Figure S13:** UV-vis spectra of **3** in (a) MeOH, (b) EtOH, (c) DMF and (d) DMSO.

### Supplementary Tables

**Table S1.** Bond lengths (Å) for **1**.

|         |          |                      |          |
|---------|----------|----------------------|----------|
| O3-S1   | 1.430(4) | O3-Na1 <sup>i</sup>  | 2.361(4) |
| O4-S1   | 1.453(4) | O5-S1                | 1.454(4) |
| S1-C11  | 1.763(4) | Na1-O6               | 2.303(4) |
| Na1-O2  | 2.353(3) | Na1-O3 <sup>ii</sup> | 2.360(4) |
| Na1-O7  | 2.361(4) | Na1-O8               | 2.385(3) |
| Na1-N2  | 3.020(4) | C1-N2                | 1.382(5) |
| C1-C2   | 1.417(6) | C1-C7                | 1.427(6) |
| C2-N3   | 1.317(6) | C2-N4                | 1.373(5) |
| C3-N4   | 1.473(6) | C4-O1                | 1.211(5) |
| C4-N5   | 1.379(6) | C4-N4                | 1.389(6) |
| N5-C7   | 1.388(5) | N5-C6                | 1.468(6) |
| C7-O2   | 1.240(5) | C8-C9                | 1.389(6) |
| C8-C13  | 1.399(6) | C8-N1                | 1.432(5) |
| C9-C10  | 1.390(6) | C10-C11              | 1.388(6) |
| C11-C12 | 1.400(6) | C12-C13              | 1.380(6) |
| N1-N2   | 1.277(5) |                      |          |

<sup>i</sup>2-X,  $\frac{1}{2}$ +Y,  $\frac{1}{2}$ -Z, <sup>ii</sup>2-X,  $-\frac{1}{2}$ +Y,  $\frac{1}{2}$ -Z

**Table S2.** Bond angles (°) for **1**.

|                        |          |          |          |
|------------------------|----------|----------|----------|
| S1-O3-Na1 <sup>i</sup> | 128.4(2) | O3-S1-O4 | 112.5(3) |
|------------------------|----------|----------|----------|

|                         |            |                          |            |
|-------------------------|------------|--------------------------|------------|
| O3-S1-O5                | 114.2(3)   | O4-S1-O5                 | 110.8(3)   |
| O3-S1-C11               | 106.8(2)   | O4-S1-C11                | 105.9(2)   |
| O5-S1-C11               | 106.1(2)   | O6-Na1-O2                | 91.08(14)  |
| O6-Na1-O3 <sup>ii</sup> | 79.36(14)  | O2-Na1-O3 <sup>ii</sup>  | 169.03(16) |
| O6-Na1-O7               | 170.79(14) | O2-Na1-O7                | 90.01(13)  |
| O <sup>ii</sup> -Na1-O7 | 100.29(15) | O6-Na1-O8                | 104.30(14) |
| O2-Na1-O8               | 80.90(12)  | O3 <sup>ii</sup> -Na1-O8 | 96.16(15)  |
| O7-Na1-O8               | 84.91(12)  | O6-Na1-N2                | 95.55(13)  |
| O2-Na1-N2               | 58.54(11)  | O3 <sup>ii</sup> -Na1-N2 | 127.25(15) |
| O7-Na1-N2               | 77.25(11)  | O8-Na1-N2                | 135.09(12) |
| N2-C1-C2                | 126.6(4)   | N2-C1-C7                 | 113.2(4)   |
| C2-C1-C7                | 120.1(4)   | N3-C2-N4                 | 118.7(4)   |
| N3-C2-C1                | 122.4(4)   | N4-C2-C1                 | 118.9(4)   |
| O1-C4-N5                | 122.2(4)   | O1-C4-N4                 | 120.9(4)   |
| N5-C4-N4                | 116.9(4)   | C4-N5-C7                 | 124.4(4)   |
| C4-N5-C6                | 118.2(4)   | C7-N5-C6                 | 117.3(4)   |
| O2-C7-N5                | 118.8(4)   | O2-C7-C1                 | 124.7(4)   |
| N5-C7-C1                | 116.5(4)   | C9-C8-C13                | 120.5(4)   |
| C9-C8-N1                | 124.5(4)   | C13-C8-N1                | 115.0(4)   |
| C8-C9-C10               | 119.8(4)   | C11-C10-C9               | 119.7(4)   |
| C10-C11-C12             | 120.5(4)   | C10-C11-S1               | 120.1(3)   |
| C12-C11-S1              | 119.4(3)   | C13-C12-C11              | 119.8(4)   |
| C12-C13-C8              | 119.6(4)   | N2-N1-C8                 | 112.5(3)   |
| N1-N2-C1                | 117.5(3)   | N1-N2-Na1                | 134.0(3)   |
| C1-N2-Na1               | 101.3(2)   | C2-N4-C4                 | 122.8(4)   |
| C2-N4-C3                | 120.0(4)   | C4-N4-C3                 | 117.2(4)   |
| C7-O2-Na1               | 121.4(3)   |                          |            |

<sup>i</sup>2-X, <sup>1</sup>/<sub>2</sub>+Y, <sup>1</sup>/<sub>2</sub>-Z, <sup>ii</sup>2-X, -<sup>1</sup>/<sub>2</sub>+Y, <sup>1</sup>/<sub>2</sub>-Z

**Table S3.** Bond lengths (Å) for **2**.

|       |          |        |          |
|-------|----------|--------|----------|
| C1-C6 | 1.386(3) | C1-C2  | 1.394(3) |
| C1-S1 | 1.772(2) | C2-C3  | 1.383(3) |
| C3-C4 | 1.397(3) | C4-C5  | 1.394(3) |
| C4-N1 | 1.421(3) | C5-C6  | 1.398(3) |
| C7-N2 | 1.373(3) | C7-C10 | 1.413(3) |

|                     |            |                      |            |
|---------------------|------------|----------------------|------------|
| C7-C8               | 1.435(3)   | C8-O7                | 1.237(3)   |
| C8-N3               | 1.395(3)   | C9-O8                | 1.214(2)   |
| C9-N3               | 1.382(3)   | C9-N4                | 1.394(3)   |
| C10-N5              | 1.315(3)   | C10-N4               | 1.371(3)   |
| C11-N3              | 1.471(3)   | C12-N4               | 1.469(3)   |
| C13-C14             | 1.385(3)   | C13-C18              | 1.397(3)   |
| C13-S2              | 1.778(2)   | C14-C15              | 1.391(3)   |
| C15-C14             | 1.391(3)   | C15-C16              | 1.391(3)   |
| C16-C17             | 1.396(3)   | C16-N6               | 1.428(3)   |
| C17-C18             | 1.392(3)   | C18-C13              | 1.398(4)   |
| C19-N7              | 1.373(3)   | C19-C22              | 1.414(3)   |
| C19-C20             | 1.442(3)   | C20-O9               | 1.239(2)   |
| C20-N8              | 1.390(3)   | C21-O10              | 1.214(2)   |
| C21-N8              | 1.380(3)   | C21-N9               | 1.392(3)   |
| C22-N10             | 1.322(3)   | C22-N9               | 1.369(3)   |
| C23-N8              | 1.469(3)   | C24-N9               | 1.470(3)   |
| K1-O6               | 2.6836(18) | K1-O8 <sup>iii</sup> | 2.6863(15) |
| K1-O1               | 2.7305(19) | K1-O4                | 2.8491(19) |
| K1-O6 <sup>iv</sup> | 2.9660(19) | K1-O11               | 3.098(5)   |
| K1-O5               | 3.183(3)   | K1-O5 <sup>iv</sup>  | 3.190(2)   |
| K1-S2 <sup>iv</sup> | 3.5127(17) | K1-S2                | 3.5719     |
| K1-K1               | 4.3455(11) | K1-K3                | 4.6278(12) |
| K2-O12A             | 2.629(11)  | K2-O12A <sup>v</sup> | 2.629(11)  |
| K2-O10              | 2.7412(15) | K2-O10 <sup>v</sup>  | 2.7412(15) |
| K2-O2 <sup>v</sup>  | 2.7517(18) | K2-O2                | 2.7517(18) |
| K2-O12 <sup>v</sup> | 2.806(2)   | K2-O12               | 2.806(2)   |
| N1-N2               | 1.281(2)   | N6-N7                | 1.283(2)   |
| O1-S1               | 1.4524(18) | O2-S1                | 1.4488(17) |
| O3-S1               | 1.4443(18) | O4-S2                | 1.453(2)   |
| O4-K3               | 2.522(3)   | O5-S2                | 1.451(2)   |
| O5-K1               | 3.191(2)   | O6-S2                | 1.4540(18) |
| O6-K1               | 2.684(2)   | O6-K1                | 2.966(2)   |
| O8-C9               | 1.213(3)   | O13-K3               | 2.592(5)   |
| K3-S2               | 3.5237(13) | K1-S2                | 3.5719(9)  |

<sup>i</sup>-x+1/2, y-1/2, z+3/2;    <sup>ii</sup>x, -y+1/2, z-1/2;    <sup>iii</sup>-x+1/2, y+1/2, -z+3/2;    <sup>iv</sup>-x, y, -z+3/2;  
<sup>v</sup>-x, y, -z+1/2;    <sup>vi</sup>-x, -y+1, -z+1; <sup>vii</sup>x, -y+1, z+1/2

**Table S4.** Bond angles (°) for **2**.

|          |            |          |            |
|----------|------------|----------|------------|
| C6-C1-C2 | 120.69(19) | C6-C1-S1 | 122.46(16) |
|----------|------------|----------|------------|

|                                       |            |                                        |            |
|---------------------------------------|------------|----------------------------------------|------------|
| C2-C1-S1                              | 116.83(16) | C3-C2-C1                               | 120.5(2)   |
| C2-C3-C4                              | 119.26(19) | C5-C4-C3                               | 120.18(19) |
| C5-C4-N1                              | 116.27(19) | C3-C4-N1                               | 123.53(19) |
| C4-C5-C6                              | 120.39(19) | C1-C6-C5                               | 118.94(19) |
| N2-C7-C10                             | 125.49(18) | N2-C7-C8                               | 114.35(18) |
| C10-C7-C8                             | 120.16(18) | O7-C8-N3                               | 119.10(19) |
| O7-C8-C7                              | 124.69(19) | N3-C8-C7                               | 116.19(18) |
| O8-C9-N3                              | 122.62(19) | O8-C9-N4                               | 121.02(19) |
| N3-C9-N4                              | 116.36(17) | N5-C10-N4                              | 118.73(18) |
| N5-C10-C7                             | 122.22(19) | N4-C10-C7                              | 119.05(18) |
| C14-C13-C18                           | 120.3(2)   | C14-C13-S2 <sup>i</sup>                | 121.0(2)   |
| C18-C13-S2 <sup>i</sup>               | 118.7(2)   | C13-C14-C15                            | 120.4(2)   |
| C14-C15-C16                           | 119.7(2)   | C15-C16-C17                            | 119.79(19) |
| C15-C16-N6                            | 124.64(19) | C17-C16-N6                             | 115.57(18) |
| C18-C17-C16                           | 120.5(2)   | C17-C18-C13                            | 119.2(2)   |
| N7-C19-C22                            | 126.69(18) | N7-C19-C20                             | 113.89(17) |
| C22-C19-C20                           | 119.42(18) | O9-C20-N8                              | 119.30(19) |
| O9-C20-C19                            | 124.04(19) | N8-C20-C19                             | 116.66(18) |
| O10-C21-N8                            | 121.8(2)   | O10-C21-N9                             | 121.6(2)   |
| N8-C21-N9                             | 116.61(19) | N10-C22-N9                             | 119.0(2)   |
| O6-K1-O8                              | 77.94(5)   | N9-C22-C19                             | 118.97(19) |
| O8 <sup>iii</sup> -K1-O1              | 84.66(5)   | O6 <sup>ii</sup> -K1-O1                | 105.34(7)  |
| O6 <sup>ii</sup> -K1-O4               | 98.41(7)   |                                        |            |
| O8-K1-O4                              | 68.63(5)   | O4-K1-O6 <sup>iv</sup>                 | 71.78(7)   |
| O6 <sup>ii</sup> -K1-O6 <sup>iv</sup> | 79.55(6)   | O8 <sup>iii</sup> -K1-O11              | 102.44(9)  |
| O1-K1-O6 <sup>iv</sup>                | 144.18(7)  | O4-K1-O11                              | 97.20(10)  |
| O6 <sup>ii</sup> -K1-O11              | 163.30(10) | O6 <sup>ii</sup> -K1-O5                | 140.11(6)  |
| O1-K1-O11                             | 58.38(9)   | O1-K1-O5                               | 96.94(6)   |
| O6 <sup>iv</sup> -K1-O11              | 111.12(9)  | O6-K1-O5                               | 101.12(6)  |
| O8-K1-O5                              | 71.59(5)   | O8 <sup>iii</sup> -K1-O5 <sup>iv</sup> | 149.92(7)  |
| O4-K1-O5                              | 46.70(6)   | O4-K1-O5 <sup>iv</sup>                 | 85.00(7)   |
| O6 <sup>ii</sup> -K1-O5 <sup>iv</sup> | 121.63(5)  | O5-K1-O5 <sup>iv</sup>                 | 79.90(6)   |
| O1-K1-O5 <sup>iv</sup>                | 108.58(7)  | O8 <sup>iii</sup> -K1-S2 <sup>iv</sup> | 138.37(4)  |
| O6 <sup>iv</sup> -K1-O5 <sup>iv</sup> | 46.11(5)   | O4-K1-S2 <sup>iv</sup>                 | 22.80(5)   |
| O6 <sup>ii</sup> -K1-S2 <sup>iv</sup> | 103.58(4)  | O11-K1-S2                              | 75.58(8)   |
| O1-K1-S2 <sup>iv</sup>                | 132.39(5)  | O5-K1-S2                               | 23.93(4)   |
| O6-K1-S2                              | 86.59(5)   | O8 <sup>iii</sup> -K1-S2               | 67.33(4)   |
| O5-K1-S2                              | 82.73(6)   | O4-K1-S2                               | 22.80(5)   |
| O6 <sup>ii</sup> -K1-S2               | 118.94(5)  | O11-K1-S2                              | 75.58(8)   |
| O1-K1-S2                              | 118.84(4)  | O5 <sup>iv</sup> -K1-S2                | 82.73(6)   |

|                                         |            |                                      |            |
|-----------------------------------------|------------|--------------------------------------|------------|
| O6 <sup>iv</sup> -K1-S2                 | 86.59(5)   | O12A <sup>v</sup> -K2-O10            | 88.0(3)    |
| O5 <sup>iv</sup> -K1-S2 <sup>iv</sup>   | 24.40(4)   | O12A-K2-O10                          | 101.4(3)   |
| S2 <sup>iv</sup> -K1-S2                 | 76.5       | O10-K2-O10 <sup>v</sup>              | 169.56(8)  |
| O12A-K2-O10                             | 101.4(3)   | O12A-K2-O2                           | 148.6(4)   |
| O12A-K2-O10                             | 88.0(3)    | O10 <sup>v</sup> -K2-O2 <sup>v</sup> | 89.62(5)   |
| O12A-K2-O2                              | 97.0(4)    | O12A-K2-O2                           | 97.0(4)    |
| O10-K2-O2 <sup>v</sup>                  | 84.69(5)   | O10 <sup>v</sup> -K2-O2              | 84.69(5)   |
| O12A <sup>v</sup> -K2-O2                | 148.6(4)   | O10-K2-O12 <sup>v</sup>              | 94.88(4)   |
| O10-K2-O2                               | 89.62(5)   | O2 <sup>v</sup> -K2-O12 <sup>v</sup> | 79.14(6)   |
| O2 <sup>v</sup> -K2-O2                  | 114.01(8)  | O10-K2-O12                           | 92.63(4)   |
| O10 <sup>v</sup> -K2-O12 <sup>v</sup>   | 92.63(4)   | N1-N2-C7                             | 118.09(17) |
| O2 <sup>v</sup> -K2-O12                 | 166.50(7)  | C9-N3-C11                            | 117.43(17) |
| O10 <sup>v</sup> -K2-O12                | 94.88(5)   | C10-N4-C9                            | 123.27(17) |
| N2-N1-C4                                | 113.49(17) | C9-N4-C12                            | 117.27(17) |
| C9-N3-C8                                | 124.87(18) | N7-N6-C16                            | 112.89(17) |
| C8-N3-C11                               | 117.69(17) | C21-N8-C20                           | 124.64(18) |
| C10-N4-C12                              | 119.34(17) | C20-N8-C23                           | 119.22(18) |
| O1-K1-O4                                | 139.47(6)  | C22-N9-C24                           | 119.53(18) |
| O8 <sup>iii</sup> -K1-O6 <sup>iv</sup>  | 130.41(6)  | S1-O1-K1                             | 130.97(11) |
| S2-O4-K3                                | 122.56(11) | S2-O5-K1                             | 93.25(14)  |
| K3-O4-K1                                | 118.87(7)  | K1-O5-K1                             | 99.97(7)   |
| S2-O5-K1 <sup>iv</sup>                  | 90.33(10)  | S2-O6-K1 <sup>iv</sup>               | 99.53(9)   |
| S2-O6-K1 <sup>vii</sup>                 | 159.59(11) | C9-O8-K1                             | 167.92(15) |
| K1 <sup>vii</sup> -O6-K1 <sup>iv</sup>  | 100.45(6)  | O13-K3-S2                            | 109.16(9)  |
| C21-O10-K2                              | 156.71(15) | O3-S1-O2                             | 113.65(11) |
| O4-K3-S2                                | 22.05(5)   | O2-S1-O1                             | 112.80(12) |
| O3-S1-O1                                | 112.48(12) | O2-S1-C1                             | 106.91(10) |
| O3-S1-C1                                | 105.36(10) | O5-S2-O4                             | 112.13(14) |
| O1-S1-C1                                | 104.75(10) | O4-S2-O6                             | 112.25(13) |
| O5-S2-O6                                | 112.78(14) | O4-S2-C13 <sup>iii</sup>             | 105.72(12) |
| O5-S2-C13 <sup>iii</sup>                | 106.40(12) | O5-S2-K1 <sup>iv</sup>               | 65.27(8)   |
| O6-S2-C13 <sup>iii</sup>                | 106.98(10) | O6-S2-K1 <sup>iv</sup>               | 56.38(8)   |
| O4-S2-K1 <sup>iv</sup>                  | 104.75(8)  | O4-S2-K3                             | 37.10(8)   |
| C13 <sup>iii</sup> -S2-K1 <sup>iv</sup> | 149.22(9)  | C13 <sup>iii</sup> -S2-K3            | 111.30(9)  |
| O6-S2-K3                                | 75.83(10)  | O5-S2-K1                             | 62.82(1)   |
| K1 <sup>iv</sup> -S2-K3                 | 90.69(2)   | O6-S2-K1                             | 135.88(8)  |
| O4-S2-K1                                | 49.42(9)   | K1 <sup>iv</sup> -S2-K1              | 87.087(17) |
| C13 <sup>iii</sup> -S2-K1               | 116.43(7)  |                                      |            |
| K3-S2-K1                                | 81.41(3)   |                                      |            |
| N6-N7-C19                               | 118.37(17) |                                      |            |

|            |            |  |  |
|------------|------------|--|--|
| C21-N8-C23 | 116.14(17) |  |  |
| C22-N9-C21 | 123.15(18) |  |  |
| C21-N9-C24 | 117.31(17) |  |  |
| S1-O2-K2   | 128.50(11) |  |  |
| S2-O4-K1   | 107.78(12) |  |  |

<sup>i</sup>-x+1/2, y-1/2, z+3/2    <sup>ii</sup>x, -y+1/2, z-1/2    <sup>iii</sup>-x+1/2, y+1/2, -z+3/2; <sup>iv</sup>-x, y, -z+3/2    <sup>v</sup>-x, y, -z+1/2 <sup>vi</sup>-x, -y+1, -z+1; <sup>vii</sup>x, -y+1, z+1/2

**Table S5.** Bond lengths (Å) for **3**.

|                     |            |                       |            |
|---------------------|------------|-----------------------|------------|
| Ni1-N3 <sup>i</sup> | 1.8548(12) | Ni1-N3                | 1.8548(12) |
| Ni1-N1 <sup>i</sup> | 1.8937(13) | Ni1-N1                | 1.8937(13) |
| Na1-O9A             | 2.335(8)   | Na1-O8A               | 2.338(7)   |
| Na1-O9B             | 2.343(5)   | Na1-O8B               | 2.372(5)   |
| Na1-O7              | 2.3933(13) | Na1-O10               | 2.4112(14) |
| Na1-O11             | 2.4624(14) | Na1-O11 <sup>ii</sup> | 2.4339(14) |
| Na1-Na1             | 3.5970(13) | C1-C2                 | 1.422(3)   |
| C1-N2               | 1.3412(18) | C2-N3                 | 1.299(2)   |
| C1-C6               | 1.449(2)   | C3-N4                 | 1.468(2)   |
| C2-N4               | 1.3871(18) | C4-N4                 | 1.3834(19) |
| C4-O7               | 1.2181(18) | C5-N5                 | 1.4726(19) |
| C4-N5               | 1.386(2)   | C6-N5                 | 1.3836(19) |
| C6-O6               | 1.232(2)   | C7-C8                 | 1.396(2)   |
| C7-C12              | 1.389(2)   | C8-C9                 | 1.389(2)   |
| C7-N1               | 1.4493(18) | C10-C11               | 1.390(2)   |
| C9-C10              | 1.391(2)   | C11-C12               | 1.387(2)   |
| C10-S1              | 1.7751(15) | O3-S1                 | 1.4526(12) |
| N1-N2               | 1.2944(17) | O5-S1                 | 1.455(12)  |
| O4-S1               | 1.4577(13) |                       |            |

<sup>i</sup>1-X, 1-Y, 2-Z, <sup>ii</sup>1-X, -Y, 1-Z

**Table S6.** Bond angles (°) for **3**.

|                         |        |                         |          |
|-------------------------|--------|-------------------------|----------|
| N3 <sup>i</sup> -Ni1-N3 | 180.00 | N3 <sup>i</sup> -Ni1-N1 | 90.84(6) |
|-------------------------|--------|-------------------------|----------|

|                                          |            |                           |            |
|------------------------------------------|------------|---------------------------|------------|
| N3 <sup>i</sup> -Ni1-N1 <sup>i</sup>     | 89.16(6)   | N3-Ni1-N1                 | 90.84(6)   |
| N3-Ni1-N1 <sup>i</sup>                   | 89.16(6)   | N1 <sup>i</sup> -Ni1-N1   | 180.0      |
| O9A-Na1-O8A                              | 163.1(3)   | O9A-Na1-O7                | 88.5(3)    |
| O9B-Na1-O8B                              | 168.2(2)   | O9B-Na1-O7                | 83.81(17)  |
| O8A-Na1-O7                               | 88.8(4)    | O9A-Na1-O10               | 104.0(3)   |
| O8B-Na1-O7                               | 99.24(16)  | O9B-Na1-O10               | 92.8(3)    |
| O7-Na1-O10                               | 84.07(5)   | O8A-Na1-O10               | 92.3(3)    |
| O8B-Na1-O10                              | 98.89(16)  | O8A-Na1-O11               | 106.4(4)   |
| O9A-Na1-O11                              | 80.28(8)   | O8B-Na1-O11               | 99.48(9)   |
| O9B-Na1-O11                              | 78.4(3)    | O10-Na1-O11               | 90.25(5)   |
| O7-Na1-O11                               | 164.02(5)  | O8A-Na1-O11 <sup>ii</sup> | 86.4(3)    |
| O9A-Na1-O11 <sup>ii</sup>                | 84.19(10)  | O8B-Na1-O11 <sup>ii</sup> | 86.4(3)    |
| O9B-Na1-O11 <sup>ii</sup>                | 78.4(3)    | O10-Na1-O11 <sup>ii</sup> | 174.90(7)  |
| O7-Na1-O11 <sup>ii</sup>                 | 100.80(5)  | O11-Na1-O11 <sup>ii</sup> | 85.44(7)   |
| O8A-Na1-Na1 <sup>ii</sup>                | 98.5(4)    | O9A-Na1-Na1 <sup>ii</sup> | 79.43(9)   |
| O10-Na1-Na1 <sup>ii</sup>                | 133.22(4)  | O7-Na1-Na1 <sup>ii</sup>  | 141.15(5)  |
| O11 <sup>ii</sup> -Na1-Na1 <sup>ii</sup> | 42.41(3)   | O11-Na1-Na1 <sup>ii</sup> | 43.03(3)   |
| N2-C1-C2                                 | 124.47(13) | N2-C1-C6                  | 114.04(14) |
| C2-C1-C6                                 | 120.78(13) | C11-C10-S1                | 119.53(12) |
| C11-C10-C9                               | 120.61(14) | C12-C11-C10               | 119.99(15) |
| C9-C10-S1                                | 119.86(11) | N2-N1-C7                  | 109.47(12) |
| C11-C12-C7                               | 119.49(14) | C7-N1-Ni1                 | 122.04(9)  |
| N2-N1-Ni1                                | 128.70(10) | C2-N3-Ni1                 | 128.87(12) |
| N1-N2-C1                                 | 122.03(13) | C4-N4-C3                  | 116.94(12) |
| C4-N4-C2                                 | 122.70(14) | C6-N5-C4                  | 124.72(18) |
| C2-N4-C3                                 | 120.32(13) | C4-N5-C5                  | 116.30(13) |
| C6-N5-C5                                 | 118.74(14) | Na1-O11-Na1 <sup>ii</sup> | 94.55(5)   |
| C4-O7-Na1                                | 152.35(11) | O3-S1-O4                  | 111.44(8)  |
| O3-S1-O5                                 | 112.80(7)  | O3-S1-C10                 | 106.93(7)  |
| O5-S1-O4                                 | 113.04(7)  | O4-S1-C10                 | 105.73(7)  |
| O5-S1-C10                                | 106.30(7)  |                           |            |

<sup>i</sup>1-X, 1-Y, 2-Z, <sup>ii</sup>1-X, -Y, 1-Z
